# Supplementary material for: A randomised, placebo-controlled study of RIPK1 inhibitor GSK2982772 in patients with active ulcerative colitis
Source: PubMed Central journal article supplement — BMJ Open Gastroenterol. 2021 Aug 13;8(1):e000680. doi: 10.1136/bmjgast-2021-000680 (PMC8365785; doi:10.1136/bmjgast-2021-000680), 2021-08-13
Supplement: bmjgast-2021-000680supp001.pdf [file bmjgast-2021-000680supp001.pdf]

**Supplemental Table 1. Plasma and Colonic Tissue GSK2982772 Concentrations (ng/mL) (GSK2982772/OL'772<sup>a</sup> group)**

|                | Visit  | Planned Time     | n  | Median (min, max)  |
|----------------|--------|------------------|----|--------------------|
| Plasma         | Part A | Pre-dose, day 43 | 22 | 58.4 (0.0, 792)    |
|                | Part B | Day 85           | 21 | 22.4 (1.45, 975.0) |
| Colonic Tissue | Part A | Pre-dose, day 43 | 24 | 88.0 (0.0, 862.7)  |
|                | Part B | Day 85           | 20 | 37.7 (0.0, 867.0)  |

<sup>a</sup>GSK2982772/OL'772 patients received GSK2982772 60 mg TID until day 43 when all patients switched to open-label GSK2982772 at the same dose.

min, minimum; max, maximum; OL, open-label; SD, standard deviation.

**Supplemental Table 2. Adjusted Mean of the Change from Baseline in Efficacy and Biomarker Measures (Safety Population)**

| Visit                      | Treatment           | LS Mean (SE)  | Treatment Difference (95% CI) |
|----------------------------|---------------------|---------------|-------------------------------|
| <b>Total Mayo Score</b>    |                     |               |                               |
| Part A (day 43)            | Placebo / OL'772    | -1.42 (0.656) | -0.32 (-1.94, 1.30)           |
|                            | GSK2982772 / OL'772 | -1.75 (0.443) |                               |
| Part B (day 85)            | Placebo / OL'772    | -3.20 (0.895) | 0.04 (-2.14, 2.23)            |
|                            | GSK2982772 / OL'772 | -3.16 (0.583) |                               |
| <b>Partial Mayo Score</b>  |                     |               |                               |
| Part A (day 43)            | Placebo / OL'772    | -1.30 (0.557) | -0.34 (-1.72, 1.04)           |
|                            | GSK2982772 / OL'772 | -1.64 (0.376) |                               |
| Part B (day 85)            | Placebo / OL'772    | -2.87 (0.728) | -0.06 (-1.87, 1.75)           |
|                            | GSK2982772 / OL'772 | -2.93 (0.502) |                               |
| <b>3-Domain Mayo Score</b> |                     |               |                               |
| Part A (day 43)            | Placebo / OL'772    | -0.99 (0.527) | -0.37 (-1.67, 0.93)           |
|                            | GSK2982772 / OL'772 | -1.36 (0.356) |                               |
| Part B (day 85)            | Placebo / OL'772    | -2.32 (0.678) | 0.13 (-1.52, 1.79)            |
|                            | GSK2982772 / OL'772 | -2.19 (0.440) |                               |
| <b>UCEIS Total Scores</b>  |                     |               |                               |
| Part A, day 43             | Placebo / OL'772    | -0.24 (0.428) | -0.18 (-1.23, 0.87)           |
|                            | GSK2982772 / OL'772 | -0.42 (0.289) |                               |
| Part B, day 85             | Placebo / OL'772    | -0.84 (0.495) | 0.02 (-1.18, 1.22)            |
|                            | GSK2982772 / OL'772 | -0.82 (0.318) |                               |
| <b>C- Reactive Protein</b> |                     |               |                               |
| Part A, day 43             | Placebo / OL'772    | 1.06 (1.854)  | -1.69 (-6.26, 2.88)           |
|                            | GSK2982772 / OL'772 | -0.64 (1.251) |                               |
| Part B, day 85             | Placebo / OL'772    | -2.77 (1.616) | 1.12 (-2.87, 5.10)            |
|                            | GSK2982772 / OL'772 | -1.66 (1.092) |                               |

| <b>Fecal Calprotectin, Geometric LS Mean (%CVb)</b> |                     |             |                   |
|-----------------------------------------------------|---------------------|-------------|-------------------|
| Part A, day 43                                      | Placebo / OL'772    | 1.90 (40.7) | 0.23 (0.09, 0.62) |
|                                                     | GSK2982772 / OL'772 | 0.44 (27.1) |                   |
| Part B, day 85                                      | Placebo / OL'772    | 0.48 (39.9) | 0.82 (0.31, 2.18) |
|                                                     | GSK2982772 / OL'772 | 0.40 (27.2) |                   |

Placebo/OL'772 patients received placebo until day 43 when all patients switched to open-label GSK2982772 60 mg TID. GSK2982772/ OL'772 patients received GSK2982772 60 mg TID until day 43 when all patients switched to open-label GSK2982772 at the same dose.

%CVb, between subject coefficient of variation; CI, confidence interval; LS, least squares; OL, open-label; SE, standard error.

**Supplemental Table 3. Fecal Calprotectin Levels by Category (Safety Population)**

| Visit          | Level <sup>a</sup><br>µg/g | Placebo / OL'772 <sup>b</sup><br>n/N (%) | GSK2982772 / OL'772 <sup>c</sup><br>n/N (%) |
|----------------|----------------------------|------------------------------------------|---------------------------------------------|
| Part A, day 1  | <250                       | 4/11 (36)                                | 2/24 (8)                                    |
|                | ≥250                       | 4/11 (36)                                | 8/24 (33)                                   |
|                | ≥1000                      | 3/11 (27)                                | 14/24 (58)                                  |
| Part A, day 43 | <250                       | 2/11 (18)                                | 7/22 (32)                                   |
|                | ≥250                       | 2/11 (18)                                | 12/22 (55)                                  |
|                | ≥1000                      | 7/11 (64)                                | 3/22 (14)                                   |
| Part B, day 85 | <250                       | 3/11 (27)                                | 11/22 (50)                                  |
|                | ≥250                       | 5/11 (45)                                | 6/22 (27)                                   |
|                | ≥1000                      | 3/11 (27)                                | 5/22 (23)                                   |

<sup>a</sup>Diurnal variation was not controlled for and sample was not required to be the first stool of the day.

<sup>b</sup>Placebo/OL'772 patients received placebo until day 43 when all patients switched to open-label GSK2982772 60 mg TID.

<sup>c</sup>GSK2982772/OL'772 patients received GSK2982772 60 mg TID until day 43 when all patients switched to open-label GSK2982772 at the same dose.

OL, open-label; TID, 3 times daily.

**Supplemental Table 4. Mayo Endoscopic Subscore (Safety Population)**

| Visit          | Score | Placebo / OL'772 <sup>a</sup><br>n/N (%) | GSK2982772 / OL'772 <sup>b</sup><br>n/N (%) |
|----------------|-------|------------------------------------------|---------------------------------------------|
| Screening      | 2     | 3/12 (25)                                | 7/24 (29)                                   |
|                | 3     | 9/12 (75)                                | 17/24 (71)                                  |
| Part A, day 43 | 0     | 0 <sup>c</sup>                           | 1/24 (4)                                    |
|                | 1     | 0 <sup>c</sup>                           | 2/24 (8)                                    |
|                | 2     | 4/11 (36)                                | 3/24 (13)                                   |
|                | 3     | 7/11 (64)                                | 18/24 (75)                                  |
| Part B, day 85 | 0     | 0 <sup>d</sup>                           | 1/22 (5)                                    |
|                | 1     | 1/9 (11)                                 | 2/22 (9)                                    |
|                | 2     | 4/9 (44)                                 | 6/22 (27)                                   |
|                | 3     | 4/9 (44)                                 | 13/22 (59)                                  |

<sup>a</sup>Placebo/OL'772 patients received placebo until day 43 when all patients switched to open-label GSK2982772 60 mg TID.

<sup>b</sup>GSK2982772/OL'772 patients received GSK2982772 60 mg TID until day 43 when all patients switched to open-label GSK2982772 at the same dose.

<sup>c</sup>N=11.

<sup>d</sup>N=9.

CI, confidence interval; LS, least squares; OL, open-label; SE, standard error.

**Supplemental Figure 1. Patient Disposition**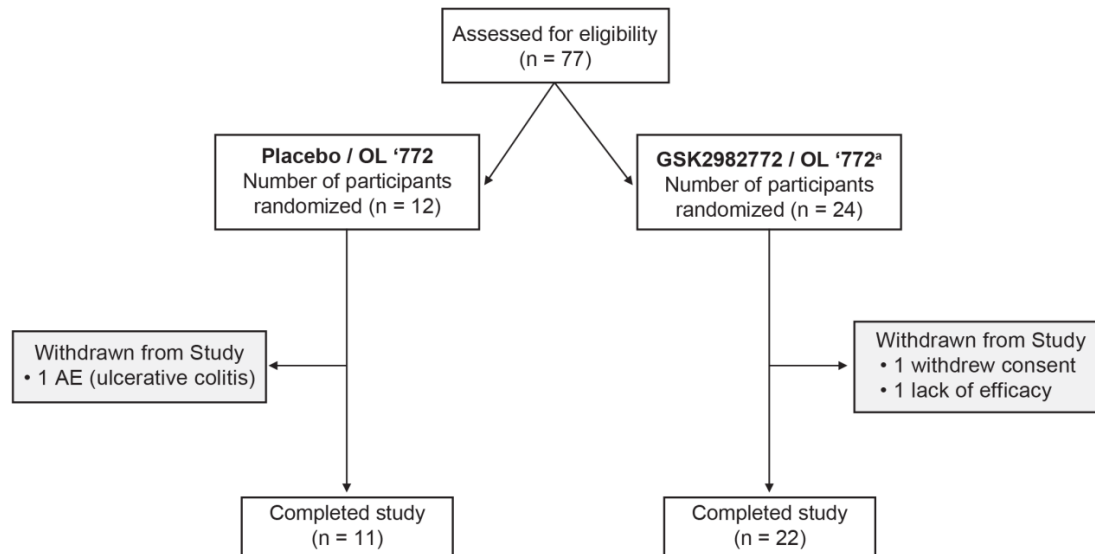

<sup>a</sup>One patient was dosed GSK2982772 60 mg BID prior to the protocol amendment that changed the dose to 60 mg TID.

AE, adverse event; BID, twice daily; OL, open-label; TID, 3 times daily.

### Supplemental Figure 2. Mean Total Mayo, Partial Mayo, and 3-Domain Mayo Scores Over Time by Treatment Group (Safety Population)

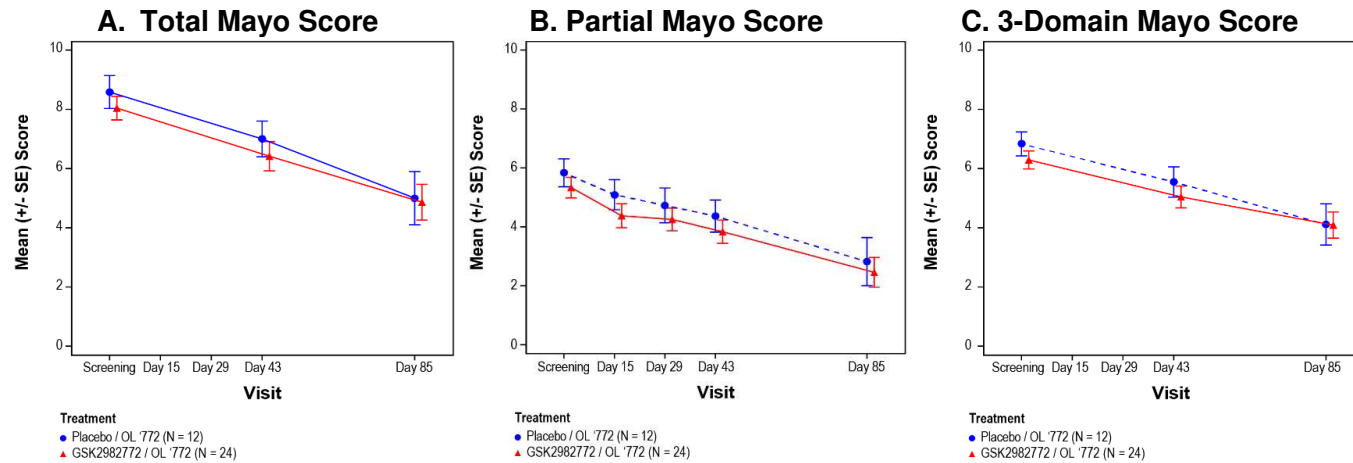

Placebo/OL'772 patients received placebo until day 43 when all patients switched to open-label GSK2982772 60 mg TID. GSK2982772/OL'772 patients received GSK2982772 60 mg TID until day 43 when all patients switched to open-label GSK2982772 at the same dose.

Total Mayo score includes stool frequency, rectal bleeding, physicians global assessment and endoscopic score; partial Mayo score includes stool frequency, rectal bleeding, and physicians global assessment; 3-domain Mayo score includes stool frequency, rectal bleeding, and endoscopic score.  
SE, standard error.

### Supplemental Figure 3. Mean Inflammatory Bowel Disease Questionnaire (IBDQ) Total Scores Over Time by Treatment Group

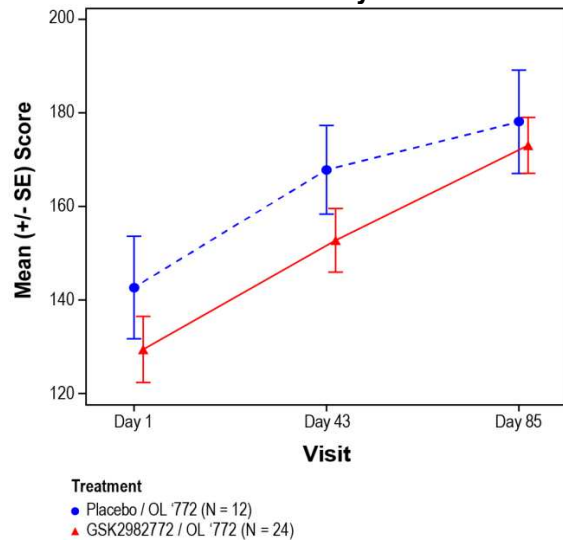

Placebo/OL 772 patients received placebo until day 43 when all patients switched to open-label GSK2982772 60 mg TID. GSK2982772/OL 772 patients received GSK2982772 60 mg TID until day 43 when all patients switched to open-label GSK2982772 at the same dose. IBDQ, inflammatory bowel disease questionnaire; OL, open-label; SE, standard error.
